# Supplementary material
Source: MDPI journal article supplement (https://www.mdpi.com/2076-3417/9/21/4559)
Supplement: s1 [file s1]

## Sheet: Hoja1
GROUP	V1	V2	V3	V4	V5	V6	V7	V8	V9	V10	V11	V12	V13	V14	Individual Practice Utility	PLM knowledge	Collaboration Engineering Perception
4	5	4	5	4	5	5	2	2	3	3	5	5	3	5	5	2	5
2	3	4	4	4	5	4	2	2	3	2	4	3	4	5	5	4	5
5	4	4	4	3	5	3	3	1	1	1	5	3	4	5	5	1	5
13	4	4	4	4	4	4	4	5	4	4	5	4	4	5	5	4	5
5	4	4	4	3	5	3	3	1	1	1	5	3	4	5	5	1	5
3	3	4	5	2	4	3	2	1	1	2	4	4	1	3	5	1	5
2	3	4	4	4	5	4	2	2	3	2	4	3	4	5	5	4	5
9	5	5	5	3	5	5	5	1	2	2	5	5	5	5	3	3	4
10	3	5	5	4	5	2	1	5	1	1	5	2	5	5	5	1	5
2	3	4	4	4	5	4	2	2	3	2	4	3	4	5	5	4	5
11	4	5	5	3	5	5	3	1	1	1	4	2	3	5	5	1	5
8	4	5	4	4	5	4	5	3	3	4	5	5	4	5	5	4	5
1	5	5	5	5	5	4	3	3	3	2	5	5	5	4	5	3	5
12	3	5	5	4	5	3	1	2	2	2	4	5	4	5	3	1	4
6	5	5	5	4	5	1	2	1	1	1	4	5	2	3	4	1	4
7	2	3	4	1	3	2	1	1	1	1	4	3	4	4	4	2	5
13	4	4	4	4	4	4	4	5	4	4	5	4	4	5	5	4	5
4	5	4	5	4	5	5	2	2	3	3	5	5	3	5	5	2	5
10	3	5	5	4	5	2	1	5	1	1	5	2	5	5	5	1	5
7	2	3	4	1	3	2	1	1	1	1	4	3	4	4	4	2	5
12	3	5	5	4	5	3	1	2	2	2	4	5	4	5	3	1	4
4	5	4	5	4	5	5	2	2	3	3	5	5	3	5	5	2	5
10	3	5	5	4	5	2	1	5	1	1	5	2	5	5	5	1	5
7	2	3	4	1	3	2	1	1	1	1	4	3	4	4	4	2	5
8	4	5	4	4	5	4	5	3	3	4	5	5	4	5	5	4	5
3	3	4	5	2	4	3	2	1	1	2	4	4	1	3	5	1	5
9	5	5	5	3	5	5	5	1	2	2	5	5	5	5	3	3	4
1	5	5	5	5	5	4	3	3	3	2	5	5	5	4	5	3	5
4	5	4	5	4	5	5	2	2	3	3	5	5	3	5	5	2	5
11	4	5	5	3	5	5	3	1	1	1	4	2	3	5	5	1	5
6	5	5	5	4	5	1	2	1	1	1	4	5	2	3	4	1	4
13	4	4	4	4	4	4	4	5	4	4	5	4	4	5	5	4	5
9	5	5	5	3	5	5	5	1	2	2	5	5	5	5	3	3	4
11	4	5	5	3	5	5	3	1	1	1	4	2	3	5	5	1	5
8	4	5	4	4	5	4	5	3	3	4	5	5	4	5	5	4	5
12	3	5	5	4	5	3	1	2	2	2	4	5	4	5	3	1	4
7	2	3	4	1	3	2	1	1	1	1	4	3	4	4	4	2	5
1	5	5	5	5	5	4	3	3	3	2	5	5	5	4	5	3	5
6	5	5	5	4	5	1	2	1	1	1	4	5	2	3	4	1	4
5	4	4	4	3	5	3	3	1	1	1	5	3	4	5	5	1	5
4	5	4	5	4	5	5	2	2	3	3	5	5	3	5	5	2	5
10	3	5	5	4	5	2	1	5	1	1	5	2	5	5	5	1	5
5	4	4	4	3	5	3	3	1	1	1	5	3	4	5	5	1	5
2	3	4	4	4	5	4	2	2	3	2	4	3	4	5	5	4	5
8	4	5	4	4	5	4	5	3	3	4	5	5	4	5	5	4	5
12	3	5	5	4	5	3	1	2	2	2	4	5	4	5	3	1	4
6	5	5	5	4	5	1	2	1	1	1	4	5	2	3	4	1	4
9	5	5	5	3	5	5	5	1	2	2	5	5	5	5	3	3	4
13	4	4	4	4	4	4	4	5	4	4	5	4	4	5	5	4	5
13	4	4	4	4	4	4	4	5	4	4	5	4	4	5	5	4	5
1	5	5	5	5	5	4	3	3	3	2	5	5	5	4	5	3	5
1	5	5	5	5	5	4	3	3	3	2	5	5	5	4	5	3	5
10	3	5	5	4	5	2	1	5	1	1	5	2	5	5	5	1	5
11	4	5	5	3	5	5	3	1	1	1	4	2	3	5	5	1	5
3	3	4	5	2	4	3	2	1	1	2	4	4	1	3	5	1	5
2	3	4	4	4	5	4	2	2	3	2	4	3	4	5	5	4	5
5	4	4	4	3	5	3	3	1	1	1	5	3	4	5	5	1	5
9	5	5	5	3	5	5	5	1	2	2	5	5	5	5	3	3	4
7	2	3	4	1	3	2	1	1	1	1	4	3	4	4	4	2	5
11	4	5	5	3	5	5	3	1	1	1	4	2	3	5	5	1	5
3	3	4	5	2	4	3	2	1	1	2	4	4	1	3	5	1	5
6	5	5	5	4	5	1	2	1	1	1	4	5	2	3	4	1	4
3	3	4	5	2	4	3	2	1	1	2	4	4	1	3	5	1	5
8	4	5	4	4	5	4	5	3	3	4	5	5	4	5	5	4	5
12	3	5	5	4	5	3	1	2	2	2	4	5	4	5	3	1	4

## Sheet: Hoja2
GROUP	n	V1	V2	V3	V4	V5	V6	V7	V8	V9	V10	V11	V12	V13	V14	IndividualPracticeUtility	PLMpreviousKnowledge	CollaborationinEngineering
1	5	5	5	5	5	5	4	3	3	3	2	5	5	5	4	5	3	5
2	5	3	4	4	4	5	4	2	2	3	2	4	3	4	5	5	4	5
3	5	3	4	5	2	4	3	2	1	1	2	4	4	1	3	5	1	5
4	5	5	4	5	4	5	5	2	2	3	3	5	5	3	5	5	2	5
5	5	4	4	4	3	5	3	3	1	1	1	5	3	4	5	5	1	5
6	5	5	5	5	4	5	1	2	1	1	1	4	5	2	3	4	1	4
7	5	2	3	4	1	3	2	1	1	1	1	4	3	4	4	4	2	5
8	5	4	5	4	4	5	4	5	3	3	4	5	5	4	5	5	4	5
9	5	5	5	5	3	5	5	5	1	2	2	5	5	5	5	3	3	4
10	5	3	5	5	4	5	2	1	5	1	1	5	2	5	5	5	1	5
12	5	3	5	5	4	5	3	1	2	2	2	4	5	4	5	3	1	4
13	5	4	4	4	4	4	4	4	5	4	4	5	4	4	5	5	4	5
